# Supplementary material for: Efficacy and safety of buparlisib, a PI3K inhibitor, in patients with malignancies harboring a PI3K pathway activation: a phase 2, open-label, single-arm study
Source: PubMed Central journal article supplement (PMC6849647; doi:10.18632/oncotarget.27251), 2019-11-05
Supplement: oncotarget-10-6526-s001.pdf [file oncotarget-10-6526-s001.pdf]

# Efficacy and safety of buparlisib, a PI3K inhibitor, in patients with malignancies harboring a PI3K pathway activation: a phase 2, open-label, single-arm study

## SUPPLEMENTARY MATERIALS

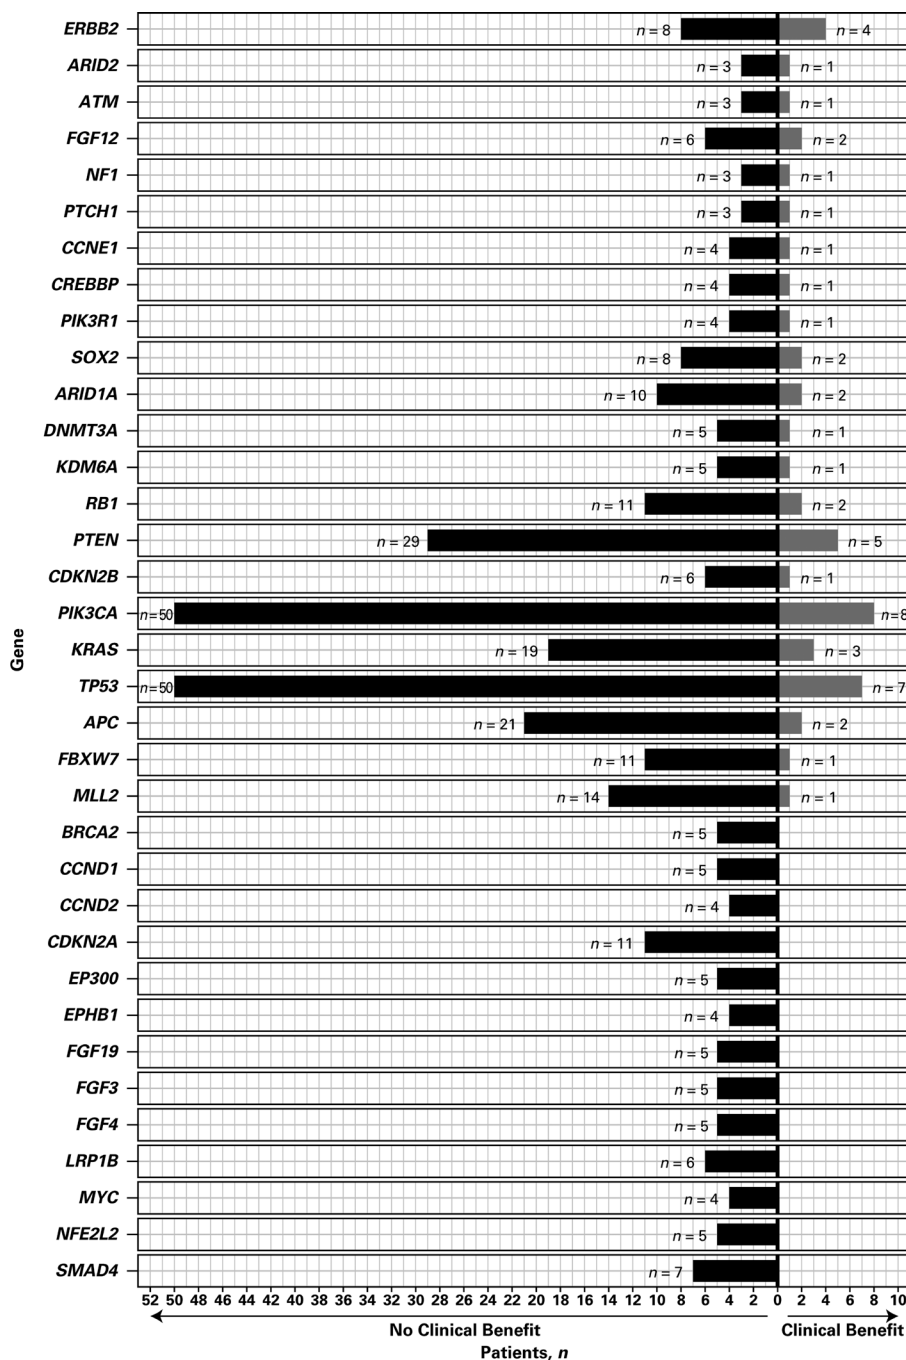

Supplementary Figure 1: Gene alterations in at least four patients by clinical benefit at week 16. Data indicate numbers of patients with each mutation (individual patients may have had more than one mutation).

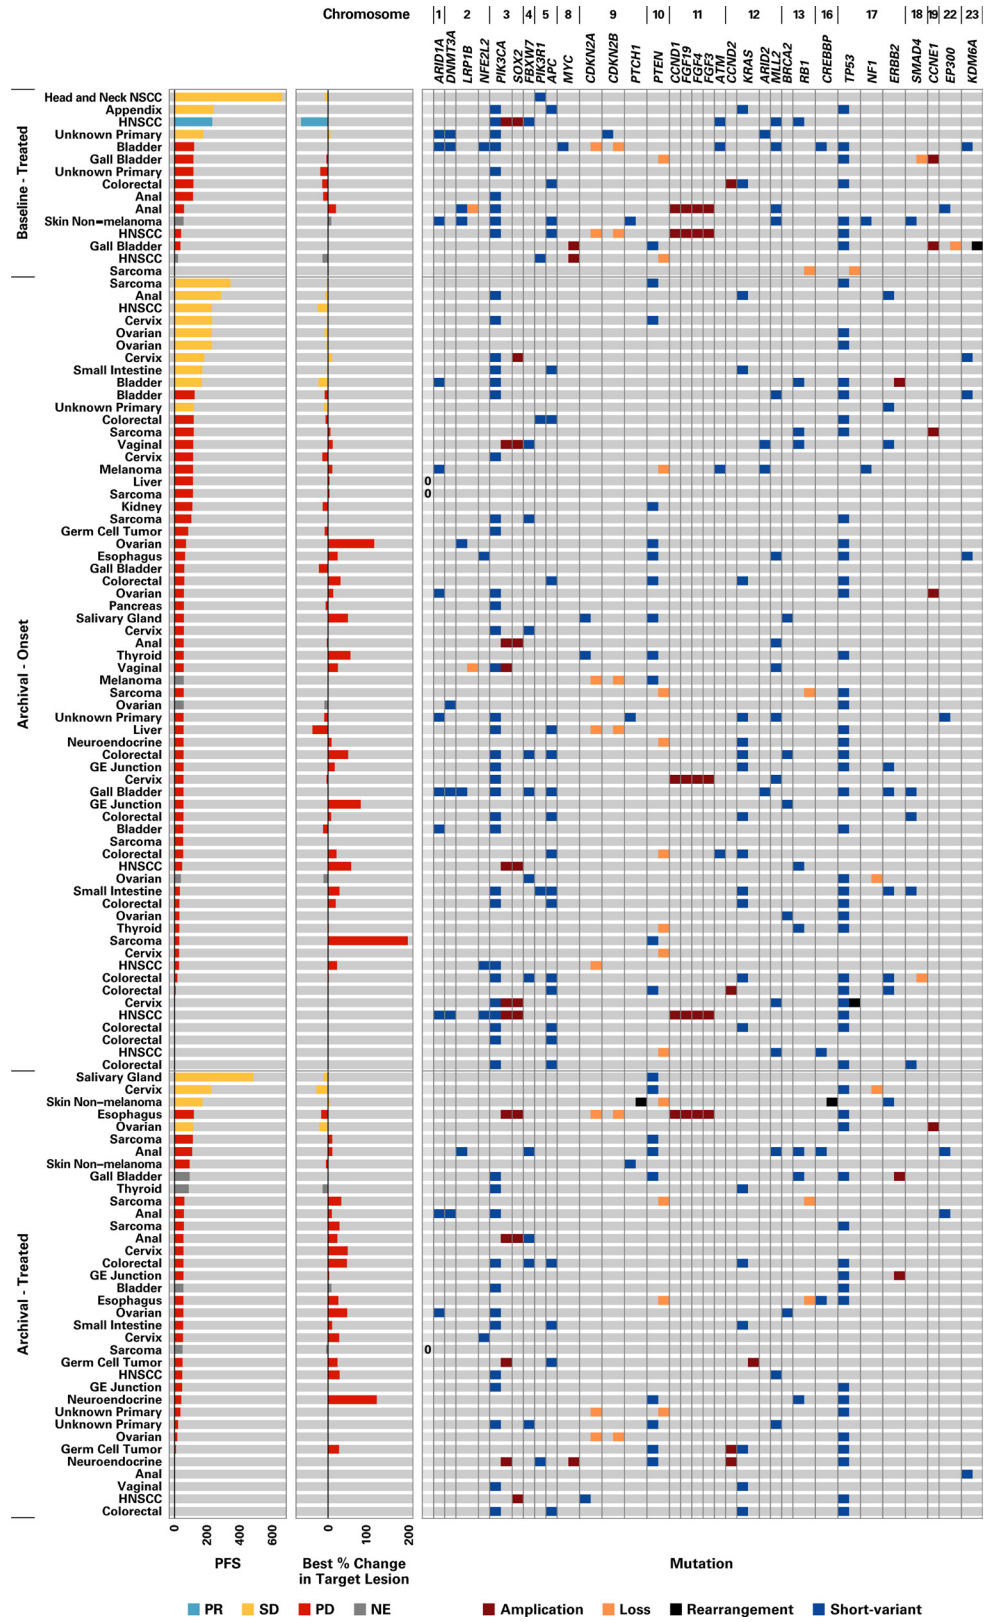

**Supplementary Figure 2: Mutational landscape of patient biopsies, grouped based on time of collection with regard to trial start and prior therapies.** Patients (rows) are sorted within each subgroup based on PFS, and bar charts are color coded based on BOR. Only functionally known and likely mutations are shown; different colored boxes indicate genera of mutations. Specific nucleotide substitutions of *PIK3CA*, *PIK3R1*, *KRAS*, and *RBI* are shown in Supplementary Table 2. Abbreviations: BOR, best overall response; GE, gastroesophageal; HNSCC, head and neck squamous cell carcinoma; NE, not evaluable; NSCC, non-squamous cell carcinoma; PD, progressive disease; PFS, progression-free survival; PR, partial response; SD, stable disease.

**Supplementary Table 1: Gene mutation frequencies highlighting whether biopsy was collected without prior therapy (onset), after some prior therapy (treated), and overall.** See Supplementary Table 1

**Supplementary Table 2: Short-variant mutations in *PIK3CA*, *PIK3R1*, *KRAS*, and *RBI*.** See Supplementary Table 2
